# Supplementary material
Source: PubMed Central journal article supplement (PMC5384039)
Supplement: mmc1.pdf [file mmc1.pdf]

## Supplemental Data

### Mutations in the Spliceosome Component *CWC27*

#### Cause Retinal Degeneration

#### with or without Additional Developmental Anomalies

Mingchu Xu, Yajing (Angela) Xie, Hana Abouzeid, Christopher T. Gordon, Alessia Fiorentino, Zixi Sun, Anna Lehman, Ihab S. Osman, Rachayata Dharmat, Rosa Riveiro-Alvarez, Linda Bapst-Wicht, Darwin Babino, Gavin Arno, Virginia Busetto, Li Zhao, Hui Li, Miguel A. Lopez-Martinez, Liliana F. Azevedo, Laurence Hubert, Nikolas Pontikos, Aiden Eblimit, Isabel Lorda-Sanchez, Valeria Kheir, Vincent Plagnol, Myriam Oufadem, Zachry T. Soens, Lizhu Yang, Christine Bole-Feysot, Rolph Pfundt, Nathalie Allaman-Pillet, Patrick Nitschké, Michael E. Cheetham, Stanislas Lyonnet, Smriti A. Agrawal, Huajin Li, Gaëtan Pinton, Michel Michaelides, Claude Besmond, Yumei Li, Zhisheng Yuan, Johannes von Lintig, Andrew R. Webster, Hervé Le Hir, Peter Stoilov, UK Inherited Retinal Dystrophy Consortium, Jeanne Amiel, Alison J. Hardcastle, Carmen Ayuso, Ruifang Sui, Rui Chen, Rando Allikmets, and Daniel F. Schorderet

## SUPPLEMENTAL DATA

**Table S1. Detailed information of *CWC27* variants identified in this study**

| Hg19 coordinate (chromosome 5) | Ref | Alt | cDNA changes | Protein changes                  | ExAC frequency | gnomAD frequency |
|--------------------------------|-----|-----|--------------|----------------------------------|----------------|------------------|
| 64,181,274                     | G   | T   | c.943G>T     | p.Glu315*                        | Absent         | Absent           |
| 64,081,406                     | G   | A   | c.495G>A     | p.Leu167Glyfs*3                  | Absent         | 1 in 30,240      |
| 64,181,325                     | C   | CA  | c.1002dupA   | p.Val335Serfs*13                 | Absent         | Absent           |
| 64,082,455                     | G   | A   | c.599+1G>A   | p.[Val166Lysfs*3; Val191Lysfs*3] | 1 in 77,894    | 1 in 195,976     |
| 64,064,992                     | C   | T   | c.19C>T      | p.Gln7*                          | 1 in 121,230   | 1 in 252,340     |
| 64,081,338                     | C   | T   | c.427C>T     | p.Arg143*                        | 1 in 111,918   | Absent           |
| 64,084,795                     | C   | A   | c.617C>A     | p.Ser206*                        | 1 in 120,770   | Absent           |

Ref, reference allele; Alt, alternative allele; cDNA and proteins annotations were based on GenBank: NM\_005869.3 and GenPept: NP\_005860.2.

**Table S2. Statistical evaluation of genotype ratio for *Cwc27* *tm1b* allele**

| Genotype                                        | Expected proportion | # individuals | Observed proportion | z-value | H <sub>0</sub> rejected* | Population size |
|-------------------------------------------------|---------------------|---------------|---------------------|---------|--------------------------|-----------------|
| <b>E12.5 <i>Cwc27</i></b>                       |                     |               |                     |         |                          |                 |
| +/+                                             | 0.25                | 9             | 0.45                | -2.066  | No                       | 20              |
| +/-                                             | 0.50                | 8             | 0.40                | 0.894   | No                       |                 |
| -/-                                             | 0.25                | 3             | 0.15                | 1.033   | No                       |                 |
| <b>E14.5 <i>Cwc27</i></b>                       |                     |               |                     |         |                          |                 |
| +/+                                             | 0.25                | 4             | 0.33                | -0.667  | No                       | 12              |
| +/-                                             | 0.50                | 6             | 0.50                | 0.000   | No                       |                 |
| -/-                                             | 0.25                | 2             | 0.17                | 0.667   | No                       |                 |
| <b>E16.5 <i>Cwc27</i></b>                       |                     |               |                     |         |                          |                 |
| +/+                                             | 0.25                | 1             | 0.14                | 0.655   | No                       | 7               |
| +/-                                             | 0.50                | 3             | 0.43                | 0.378   | No                       |                 |
| -/-                                             | 0.25                | 3             | 0.43                | -1.091  | No                       |                 |
| <b>E18.5 <i>Cwc27</i></b>                       |                     |               |                     |         |                          |                 |
| +/+                                             | 0.25                | 5             | 0.28                | -0.272  | No                       | 18              |
| +/-                                             | 0.50                | 10            | 0.56                | -0.471  | No                       |                 |
| -/-                                             | 0.25                | 3             | 0.17                | 0.816   | No                       |                 |
| <b><i>Cwc27</i> embryos from E12.5 to E18.5</b> |                     |               |                     |         |                          |                 |
| +/+                                             | 0.25                | 19            | 0.33                | -1.453  | No                       | 57              |
| +/-                                             | 0.50                | 27            | 0.47                | 0.397   | No                       |                 |
| -/-                                             | 0.25                | 11            | 0.19                | 0.994   | No                       |                 |
| <b><i>Cwc27</i> Adult (56 litters)</b>          |                     |               |                     |         |                          |                 |
| +/+                                             | 0.25                | 111           | 0.62                | -3.130  | Yes                      | 180             |
| +/-                                             | 0.50                | 66            | 0.37                | -3.614  | Yes                      |                 |
| -/-                                             | 0.25                | 3             | 0.02                | 7.229   | Yes                      |                 |

+: *Cwc27*, wild-type allele; -, *Cwc27<sup>tm1b</sup>* mutant allele.

\* Statistics: two-tailed Z-test of population proportion, H<sub>0</sub>: observed proportion = Mendelian proportion, alpha level of 0.01, Z-score value |z| = 2.576.
